# Supplementary material
Source: HighWire-hosted journal article supplement (https://hw-f5-jim.highwire.org/content/jim-2022-002439)
Supplement: inline-supplementary-material-1 [file inline-supplementary-material-1.pdf]

**SUPPLEMENTARY MATERIAL****Supplemental Table 1. ICD-9 Codes Utilized for Stroke and Stroke Risk Factors**

| <b>ICD 9 Code</b> | <b>Description</b>                            |
|-------------------|-----------------------------------------------|
| 431               | Intracerebral hemorrhage                      |
| 432               | Other and unspecified intracranial hemorrhage |
| 434               | Cerebral artery occlusion                     |
| 401               | Essential hypertension                        |
| 250               | Diabetes mellitus                             |
| V15.82            | Personal history of tobacco use               |
| 305.1             | Tobacco use disorder                          |
| 427.31            | Atrial fibrillation                           |
| 272               | Disorders of lipid metabolism                 |

**Supplemental Table 2. ICD-10 Codes Utilized for Stroke and Stroke Risk Factors**

| <b>ICD 10 Code</b> | <b>Description</b>                                          |
|--------------------|-------------------------------------------------------------|
| I61                | Nontraumatic intracerebral hemorrhage                       |
| I62                | Other and unspecified nontraumatic intracerebral hemorrhage |
| I63                | Cerebral infarction                                         |
| I10                | Essential hypertension                                      |
| E10                | Type 1 Diabetes mellitus                                    |
| E11                | Type 2 Diabetes mellitus                                    |
| Z72.0              | Tobacco use                                                 |
| F17.21             | Nicotine dependence, cigarettes                             |
| I48                | Atrial fibrillation                                         |
| E78                | Disorders of lipid metabolism                               |

**Supplemental Table 3. Results of the Simple CPH Models among ESRD Stroke Patients**

| Variable                                     | Level        | Simple CPH Models |             |         |
|----------------------------------------------|--------------|-------------------|-------------|---------|
|                                              |              | HR                | 95% CI      | p-value |
| <b>Main Independent Variable</b>             |              |                   |             |         |
| Dialysis Modality                            | CRRT         | 1.20              | 1.17-1.23   | <0.0001 |
|                                              | IHD          | 1.00              |             |         |
| <b>Demographic and Clinical Risk Factors</b> |              |                   |             |         |
| Age at first stroke                          |              | 1.020             | 1.020-1.021 | <0.0001 |
| Sex                                          | Female       | 0.97              | 0.96-0.99   | 0.0001  |
|                                              | Male         | 1.00              |             |         |
| Race                                         | Black        | 0.79              | 0.78-0.80   | <0.0001 |
|                                              | Other        | 0.87              | 0.84-0.90   |         |
|                                              | White        | 1.00              |             |         |
| Ethnicity                                    | Hispanic     | 0.85              | 0.84-0.87   | <0.0001 |
|                                              | Non-Hispanic | 1.00              |             |         |
| Essential Hypertension                       | Yes          | 1.08              | 1.05-1.09   | <0.0001 |
|                                              | No           | 1.00              |             |         |
| Diabetes                                     | Yes          | 1.08              | 1.06-1.09   | <0.0001 |
|                                              | No           | 1.00              |             |         |
| Tobacco                                      | Yes          | 1.13              | 1.011-1.15  | <0.0001 |
|                                              | No           | 1.00              |             |         |
| Atrial Fibrillation                          | Yes          | 1.50              | 1.47-1.52   | <0.0001 |
|                                              | No           | 1.00              |             |         |
| Hyperlipidemia                               | Yes          | 1.05              | 1.04-1.07   | <0.0001 |
|                                              | No           | 1.00              |             |         |

**Supplemental Table 4. ICD-9 and -10 Codes Used to Control for Risk Factors for Mortality in ESRD Patients with Stroke Admitted to the ICU**

| <b>Codes Used for the Charlson Comorbidity Index (Not Including Stroke or Renal Disease)</b> |                                                                 |                                                                                                                                                                                                                             |
|----------------------------------------------------------------------------------------------|-----------------------------------------------------------------|-----------------------------------------------------------------------------------------------------------------------------------------------------------------------------------------------------------------------------|
|                                                                                              | <b>ICD-9 Codes</b>                                              | <b>ICD-10 Codes</b>                                                                                                                                                                                                         |
| Acute MI                                                                                     | 410, 412                                                        | I21, I22, I252                                                                                                                                                                                                              |
| Congestive Heart Failure                                                                     | 428                                                             | I50                                                                                                                                                                                                                         |
| Peripheral Vascular Disease                                                                  | 441, 4439, 7854, V434                                           | I71, I790, I739, R02, Z958, Z959                                                                                                                                                                                            |
| Dementia                                                                                     | 290                                                             | F00, F01, F02, F051                                                                                                                                                                                                         |
| Pulmonary Disease                                                                            | 490, 491, 492, 493, 494, 495, 496, 500, 501, 502, 503, 504, 505 | J40, J41, J42, J44, J43, J45, J46, J47, J67, J44, J60, J61, J62, J63, J66, J64, J65                                                                                                                                         |
| Connective Tissue Disorder or Rheumatologic Disease                                          | 7100, 7101, 7104, 7140, 7141, 7142, 71481(now 5171), 725        | M32, M34, M332, M053, M058, M059, M060, M063, M069, M050, M052, M051, M353                                                                                                                                                  |
| Peptic Ulcer                                                                                 | 531, 532, 533, 534                                              | K25, K26, K27, K28                                                                                                                                                                                                          |
| Liver Disease                                                                                | 5712, 5714, 5715, 5716                                          | K702, K703, K73, K717, K740, K742, K746, K743, K744, K745                                                                                                                                                                   |
| Paraplegia                                                                                   | 342, 3441                                                       | G81 G041, G820, G821, G822                                                                                                                                                                                                  |
| Cancer                                                                                       | 140-172, 174-195, 200, 201, 202, 203, 204, 205, 206, 207, 208   | C0, C1, C2, C3, C40, C41, C43, C45, C46, C47, C48, C49, C5, C6, C70, C71, C72, C73, C74, C75, C76, C80, C81, C82, C83, C84, C85, C883, C887, C889, C900, C901, C91, C92, C93, C940, C941, C942, C943, C9451, C947, C95, C96 |
| Metastatic Cancer                                                                            | 196, 197, 198, 1990, 1991                                       | C77, C78, C79, C80                                                                                                                                                                                                          |
| Severe Liver Disease                                                                         | 5722, 5723, 5724, 5728                                          | K729, K766, K767, K721                                                                                                                                                                                                      |
| HIV/Aids                                                                                     | 042, 043, 044                                                   | B20, B21, B22, B23, B24                                                                                                                                                                                                     |
| <b>Other Variables (with the Appropriate ICD-9 and -10 Codes) Examined</b>                   |                                                                 |                                                                                                                                                                                                                             |
| Obesity                                                                                      | 278                                                             | E66                                                                                                                                                                                                                         |
| Alcohol Abuse                                                                                | 305.0, 305.3                                                    | F10.0, F10.1                                                                                                                                                                                                                |
| Malnutrition/Hypoalbuminemia                                                                 | 262, 263.0, 263.1, 273.8, 263.8, 239.9                          | E43, E44, E88.09, E46                                                                                                                                                                                                       |

**Supplemental Table 5: Descriptive statistics overall and by CRRT among ICU Stroke Patients**

| Variable                                     | Level        | Overall      | CRRT        |              |       |             |         |
|----------------------------------------------|--------------|--------------|-------------|--------------|-------|-------------|---------|
|                                              |              |              | Yes         | No           | OR    | 95% CI      | p-value |
| <b>Outcome</b>                               |              |              |             |              |       |             |         |
| Mortality – n (%)                            | Died         | 33930 (89.8) |             |              |       |             |         |
|                                              | Alive        | 3872 (10.2)  |             |              |       |             |         |
| Time to Death – mean (SD)                    |              | 1.5 (2)      |             |              |       |             |         |
| <b>Main Independent Variable</b>             |              |              |             |              |       |             |         |
| CRRT – n (%)                                 | Yes          | 3127 (8.3)   |             |              |       |             |         |
|                                              | No           | 34675 (91.7) |             |              |       |             |         |
| <b>Demographic and Clinical Risk Factors</b> |              |              |             |              |       |             |         |
| Age at first stroke – mean                   |              | 68.2 (12.9)  | 64.6 (13.3) | 68.5 (12.8)  | 0.978 | 0.975-0.981 | <0.0001 |
| Sex – n (%)                                  | Female       | 19014 (50.3) | 1517 (48.5) | 17497 (50.5) | 0.93  | 0.86-0.99   | 0.0371  |
|                                              | Male         | 18788 (49.7) | 1610 (51.5) | 17178 (49.5) |       |             |         |
| Race – n (%)                                 | Black        | 11933 (31.6) | 818 (26.2)  | 11115 (32.1) | 0.74  | 0.68-0.81   | <0.0001 |
|                                              | Other        | 1870 (5)     | 144 (4.6)   | 1726 (5)     | 0.84  | 0.71-1.00   |         |
|                                              | White        | 23999 (63.5) | 2165 (69.2) | 21834 (63)   |       |             |         |
| Ethnicity – n (%)                            | Hispanic     | 4906 (13)    | 297 (9.5)   | 4609 (13.3)  | 0.69  | 0.61-0.78   | <0.0001 |
|                                              | Non-Hispanic | 32896 (87)   | 2830 (90.5) | 30066 (86.7) |       |             |         |
| Stroke Type – n (%)                          | Hemorrhagic  | 9945 (26.3)  | 899 (28.8)  | 9046 (26.1)  | 1.14  | 1.05-1.24   | 0.0012  |
|                                              | Acute        | 27857 (73.7) | 2228 (71.3) | 25629 (73.9) |       |             |         |
| Essential Hypertension – n (%)               | Yes          | 27668 (73.2) | 2123 (67.9) | 25545 (73.7) | 0.76  | 0.70-0.82   | <0.0001 |
|                                              | No           | 10134 (26.8) | 1004 (32.1) | 9130 (26.3)  |       |             |         |
| Diabetes – n (%)                             | Yes          | 26805 (70.9) | 2049 (65.5) | 24756 (71.4) | 0.76  | 0.71-0.82   | <0.0001 |
|                                              | No           | 10997 (29.1) | 1078 (34.5) | 9919 (28.6)  |       |             |         |
| Tobacco – n (%)                              | Yes          | 8680 (23)    | 789 (25.2)  | 7891 (22.8)  | 1.15  | 1.05-1.25   | 0.0016  |
|                                              | No           | 29122 (77)   | 2338 (74.8) | 26784 (77.2) |       |             |         |
| Atrial Fibrillation – n (%)                  | Yes          | 8586 (22.7)  | 554 (17.7)  | 8032 (23.2)  | 0.71  | 0.65-0.79   | <0.0001 |
|                                              | No           | 29216 (77.3) | 2573 (82.3) | 26643 (76.8) |       |             |         |
| Hyperlipidemia – n (%)                       | Yes          | 21933 (58)   | 1905 (60.9) | 20028 (57.8) | 1.14  | 1.06-1.23   | 0.0006  |
|                                              | No           | 15869 (42)   | 1222 (39.1) | 14647 (42.2) |       |             |         |
| Obesity                                      | Yes          | 6373 (16.9)  | 592 (18.9)  | 5781 (16.7)  | 1.17  | 1.06-1.28   | 0.0012  |
|                                              | No           | 31429 (83.1) | 2535 (81.1) | 28894 (83.3) |       |             |         |

**Supplemental Table 5: Descriptive statistics overall and by CRRT among ICU Stroke Patients**

| Variable                    | Level | Overall      | CRRT        |              |      |           |         |
|-----------------------------|-------|--------------|-------------|--------------|------|-----------|---------|
|                             |       |              | Yes         | No           | OR   | 95% CI    | p-value |
| Alcohol Use                 | Yes   | 1060 (2.8)   | 71 (2.3)    | 989 (2.9)    | 0.79 | 0.62-1.01 | 0.0599  |
|                             | No    | 36742 (97.2) | 3056 (97.7) | 33686 (97.2) |      |           |         |
| Malnutrition                | Yes   | 3201 (8.5)   | 300 (9.6)   | 2901 (8.4)   | 1.16 | 1.03-1.32 | 0.0183  |
|                             | No    | 34601 (91.5) | 2827 (90.4) | 31774 (91.6) |      |           |         |
| Myocardial Infarction       | Yes   | 14319 (37.9) | 1198 (38.3) | 13121 (37.8) | 1.02 | 0.95-1.10 | 0.6019  |
|                             | No    | 23483 (62.1) | 1929 (61.7) | 21554 (62.2) |      |           |         |
| Congestive Heart Failure    | Yes   | 28192 (74.6) | 1994 (63.8) | 26198 (75.6) | 0.57 | 0.53-0.62 | <0.0001 |
|                             | No    | 9610 (25.4)  | 1133 (36.2) | 8477 (24.5)  |      |           |         |
| Peripheral Vascular Disease | Yes   | 15993 (42.3) | 1152 (36.8) | 14841 (42.8) | 0.78 | 0.72-0.84 | <0.0001 |
|                             | No    | 21809 (57.7) | 1975 (63.2) | 19834 (57.2) |      |           |         |
| Dementia                    | Yes   | 2446 (6.5)   | 88 (2.8)    | 2358 (6.8)   | 0.40 | 0.32-0.49 | <0.0001 |
|                             | No    | 35356 (93.5) | 3039 (97.2) | 32317 (93.2) |      |           |         |
| Pulmonary Disease           | Yes   | 18087 (47.9) | 1324 (42.3) | 16763 (48.3) | 0.79 | 0.73-0.85 | <0.0001 |
|                             | No    | 19715 (52.2) | 1803 (57.7) | 17912 (51.7) |      |           |         |
| Connective Tissue Disease   | Yes   | 2352 (6.2)   | 247 (7.9)   | 2105 (6.1)   | 1.33 | 1.16-1.52 | <0.0001 |
|                             | No    | 35450 (93.8) | 2880 (92.1) | 32570 (93.9) |      |           |         |
| Peptic Ulcer Disease        | Yes   | 3705 (9.8)   | 271 (8.7)   | 3434 (9.9)   | 0.86 | 0.76-0.98 | 0.0260  |
|                             | No    | 34097 (90.2) | 2856 (91.3) | 31241 (90.1) |      |           |         |
| Mild Liver Disease          | Yes   | 1265 (3.4)   | 112 (3.6)   | 1153 (3.3)   | 1.08 | 0.89-1.32 | 0.4450  |
|                             | No    | 36537 (96.7) | 3015 (96.4) | 33522 (96.7) |      |           |         |
| Paraplegia                  | Yes   | 6518 (17.2)  | 596 (19.1)  | 5922 (17.1)  | 1.14 | 1.04-1.26 | 0.0050  |
|                             | No    | 31284 (82.8) | 2531 (80.9) | 28753 (82.9) |      |           |         |
| Non-Metastatic Cancer       | Yes   | 4707 (12.5)  | 393 (12.6)  | 4314 (12.4)  | 1.01 | 0.91-1.13 | 0.8366  |
|                             | No    | 33095 (87.6) | 2734 (87.4) | 30361 (87.6) |      |           |         |
| Metastatic Cancer           | Yes   | 1213 (3.2)   | 80 (2.6)    | 1133 (3.3)   | 0.78 | 0.62-0.98 | 0.0317  |
|                             | No    | 36589 (96.8) | 3047 (97.4) | 33542 (96.7) |      |           |         |
| Severe Liver Disease        | Yes   | 1194 (3.2)   | 91 (2.9)    | 1103 (3.2)   | 0.91 | 0.73-1.13 | 0.4071  |
|                             | No    | 36608 (96.8) | 3036 (97.1) | 33572 (96.8) |      |           |         |
| HIV                         | Yes   | 557 (1.5)    | 50 (1.6)    | 507 (1.5)    | 1.10 | 0.82-1.47 | 0.5432  |
|                             | No    | 37245 (98.5) | 3077 (98.4) | 34168 (98.5) |      |           |         |

**Supplemental Table 6: Descriptive statistics overall and by mortality and CPH model results among ICU Stroke Patients**

| Variable                                      | Level       | Mortality    |             | Simple CPH Models |           |         | Final CPH Model |              |         |           |
|-----------------------------------------------|-------------|--------------|-------------|-------------------|-----------|---------|-----------------|--------------|---------|-----------|
|                                               |             | Died         | Alive       | HR                | 95% CI    | p-value | HR              | 95% CI       | p-value |           |
| Time to Death                                 |             | 69 (12.6)    | 61.4 (13.1) |                   |           |         |                 |              |         |           |
| <b>Main Independent Variable</b>              |             |              |             |                   |           |         |                 |              |         |           |
| CRRT                                          | Yes         | 2794 (89.4)  | 333 (10.7)  | 1.17              | 1.13-1.33 | <0.0001 | 1.32            | 1.27-1.37    | <0.0001 |           |
|                                               | No          | 31136 (89.8) | 3539 (10.2) |                   |           |         |                 |              |         |           |
| <b>Demographic and Clinical Risk Factors*</b> |             |              |             |                   |           |         |                 |              |         |           |
| Age at first                                  |             | 1.3 (1.8)    | 2.9 (2.5)   | 1.018             | 1.017-    | <0.0001 | 1.016           | 1.015-1.-017 | <0.0001 |           |
| Sex                                           | Female      | 17126 (90.1) | 1888 (9.9)  | 0.99              | 0.97-1.01 | 0.4367  |                 |              |         |           |
|                                               | Male        | 16804 (89.4) | 1984 (10.6) |                   |           |         |                 |              |         |           |
| Race                                          | Black       | 10316 (86.5) | 1617 (13.6) | 0.82              | 0.80-0.84 | <0.0001 | 0.86            | 0.84-0.89    | <0.0001 |           |
|                                               | Other       | 1639 (87.7)  | 231 (12.4)  | 0.87              | 0.83-0.91 |         |                 | 0.88         |         | 0.84-0.93 |
|                                               | White       | 21975 (91.6) | 2024 (8.4)  |                   |           |         |                 |              |         |           |
| Ethnicity                                     | Hispanic    | 4210 (85.8)  | 696 (14.2)  | 0.85              | 0.82-0.87 | <0.0001 | 0.85            | 0.82-0.88    | <0.0001 |           |
|                                               | Non-        | 29720 (90.4) | 3176 (9.7)  |                   |           |         |                 |              |         |           |
| Stroke Type                                   | Hemorrhagic | 8922 (89.7)  | 1023 (10.3) | 1.03              | 1.00-1.05 | 0.0244  | 1.09            | 1.07-1.12    | <0.0001 |           |
|                                               | Acute       | 25008 (89.8) | 2849 (10.2) |                   |           |         |                 |              |         |           |
| Essential Hypertension                        | Yes         | 25409 (91.8) | 2259 (8.2)  | 1.09              | 1.07-1.12 | <0.0001 |                 |              |         |           |
|                                               | No          | 8521 (84.1)  | 1613 (15.9) |                   |           |         |                 |              |         |           |
| Diabetes                                      | Yes         | 24258 (90.5) | 2547 (9.5)  | 1.10              | 1.07-1.13 | <0.0001 | 1.12            | 1.09-1.15    | <0.0001 |           |
|                                               | No          | 9672 (88)    | 1325 (12.1) |                   |           |         |                 |              |         |           |
| Tobacco                                       | Yes         | 7600 (87.6)  | 1080 (12.4) | 1.10              | 1.07-1.13 | <0.0001 | 1.03            | 1.00-1.06    | 0.0301  |           |
|                                               | No          | 26330 (90.4) | 2792 (9.6)  |                   |           |         |                 |              |         |           |
| Atrial Fibrillation                           | Yes         | 8080 (94.1)  | 506 (5.9)   | 1.47              | 1.44-1.51 | <0.0001 | 1.19            | 1.16-1.22    | <0.0001 |           |
|                                               | No          | 25850 (88.5) | 3366 (11.5) |                   |           |         |                 |              |         |           |
| Hyperlipidemia                                | Yes         | 19663 (89.7) | 2270 (10.4) | 1.07              | 1.04-1.09 | <0.0001 | 0.90            | 0.88-0.92    | <0.0001 |           |
|                                               | No          | 14267 (89.9) | 1602 (10.1) |                   |           |         |                 |              |         |           |
| Obesity                                       | Yes         | 5510 (86.5)  | 863 (13.5)  | 1.03              | 0.99-1.06 | 0.0923  |                 |              |         |           |
|                                               | No          | 28420 (90.4) | 3009 (9.6)  |                   |           |         |                 |              |         |           |
| Alcohol Use                                   | Yes         | 927 (87.5)   | 133 (12.6)  | 0.99              | 0.93-1.06 | 0.7470  |                 |              |         |           |
|                                               | No          | 33003 (89.8) | 3739 (10.2) |                   |           |         |                 |              |         |           |

**Supplemental Table 6: Descriptive statistics overall and by mortality and CPH model results among ICU Stroke Patients**

| Variable                  | Level | Mortality    |             | Simple CPH Models |           |         | Final CPH Model |           |         |
|---------------------------|-------|--------------|-------------|-------------------|-----------|---------|-----------------|-----------|---------|
|                           |       | Died         | Alive       | HR                | 95% CI    | p-value | HR              | 95% CI    | p-value |
| Malnutrition              | Yes   | 2865 (89.5)  | 336 (10.5)  | 1.28              | 1.24-1.33 | <0.0001 | 1.17            | 1.13-1.22 | <0.0001 |
|                           | No    | 31065 (89.8) | 3536 (10.2) |                   |           |         |                 |           |         |
| Myocardial Infarction     | Yes   | 13094 (91.4) | 1225 (8.6)  | 1.26              | 1.23-1.28 | <0.0001 | 1.11            | 1.09-1.14 | <0.0001 |
|                           | No    | 20836 (88.7) | 2647 (11.3) |                   |           |         |                 |           |         |
| Congestive Heart Failure  | Yes   | 25720 (91.2) | 2472 (8.8)  | 1.39              | 1.36-1.43 | <0.0001 | 1.20            | 1.17-1.23 | <0.0001 |
|                           | No    | 8210 (85.4)  | 1400 (14.6) |                   |           |         |                 |           |         |
| Peripheral Vascular       | Yes   | 14645 (91.6) | 1348 (8.4)  | 1.35              | 1.22-1.27 | <0.0001 | 1.11            | 1.09-1.14 | <0.0001 |
|                           | No    | 19285 (88.4) | 2524 (11.6) |                   |           |         |                 |           |         |
| Dementia                  | Yes   | 2327 (95.1)  | 119 (4.9)   | 1.44              | 1.38-1.50 | <0.0001 | 1.22            | 1.17-1.27 | <0.0001 |
|                           | No    | 31603 (89.4) | 3753 (10.6) |                   |           |         |                 |           |         |
| Pulmonary Disease         | Yes   | 16648 (92)   | 1439 (8)    | 1.29              | 1.2601.32 | <0.0001 | 1.11            | 1.09-1.14 | <0.0001 |
|                           | No    | 17282 (87.7) | 2433 (12.3) |                   |           |         |                 |           |         |
| Connective Tissue Disease | Yes   | 2083 (88.6)  | 269 (11.4)  | 1.04              | 0.99-1.09 | 0.0975  |                 |           |         |
|                           | No    | 31847 (89.8) | 3603 (10.2) |                   |           |         |                 |           |         |
| Peptic Ulcer Disease      | Yes   | 3365 (90.8)  | 340 (9.2)   | 1.17              | 1.12-1.21 | <0.0001 | 1.07            | 1.03-1.11 | 0.0006  |
|                           | No    | 30565 (89.6) | 3532 (10.4) |                   |           |         |                 |           |         |
| Mild Liver Disease        | Yes   | 1143 (90.4)  | 122 (9.6)   | 1.16              | 1.10-1.23 | <0.0001 | 1.16            | 1.09-1.23 | <0.0001 |
|                           | No    | 32787 (89.7) | 3750 (10.3) |                   |           |         |                 |           |         |
| Paraplegia                | Yes   | 5817 (89.3)  | 701 (10.8)  | 1.07              | 1.04-1.10 | <0.0001 | 1.11            | 1.08-1.14 | <0.0001 |
|                           | No    | 28113 (89.9) | 3171 (10.1) |                   |           |         |                 |           |         |
| Non-Metastatic Cancer     | Yes   | 4277 (90.9)  | 430 (9.1)   | 1.24              | 1.20-1.28 | <0.0001 | 1.11            | 1.08-1.15 | <0.0001 |
|                           | No    | 29653 (89.6) | 3442 (10.4) |                   |           |         |                 |           |         |
| Metastatic Cancer         | Yes   | 1143 (94.2)  | 70 (5.8)    | 1.68              | 1.59-1.78 | <0.0001 | 1.57            | 1.48-1.66 | <0.0001 |
|                           | No    | 32787 (89.6) | 3802 (10.4) |                   |           |         |                 |           |         |
| Severe Liver Disease      | Yes   | 1089 (91.2)  | 105 (8.8)   | 1.45              | 1.36-1.54 | <0.0001 | 1.45            | 1.36-1.54 | <0.0001 |
|                           | No    | 32841 (89.7) | 3767 (10.3) |                   |           |         |                 |           |         |
| HIV                       | Yes   | 464 (83.3)   | 93 (16.7)   | 0.88              | 0.80-0.96 | 0.0043  | 1.12            | 1.02-1.23 | 0.0174  |
|                           | No    | 33466 (89.9) | 3779 (10.2) |                   |           |         |                 |           |         |

\*Demographic and clinical risk factors lacking from the final CPH model were not included because they were not significant and did not affect model fit.

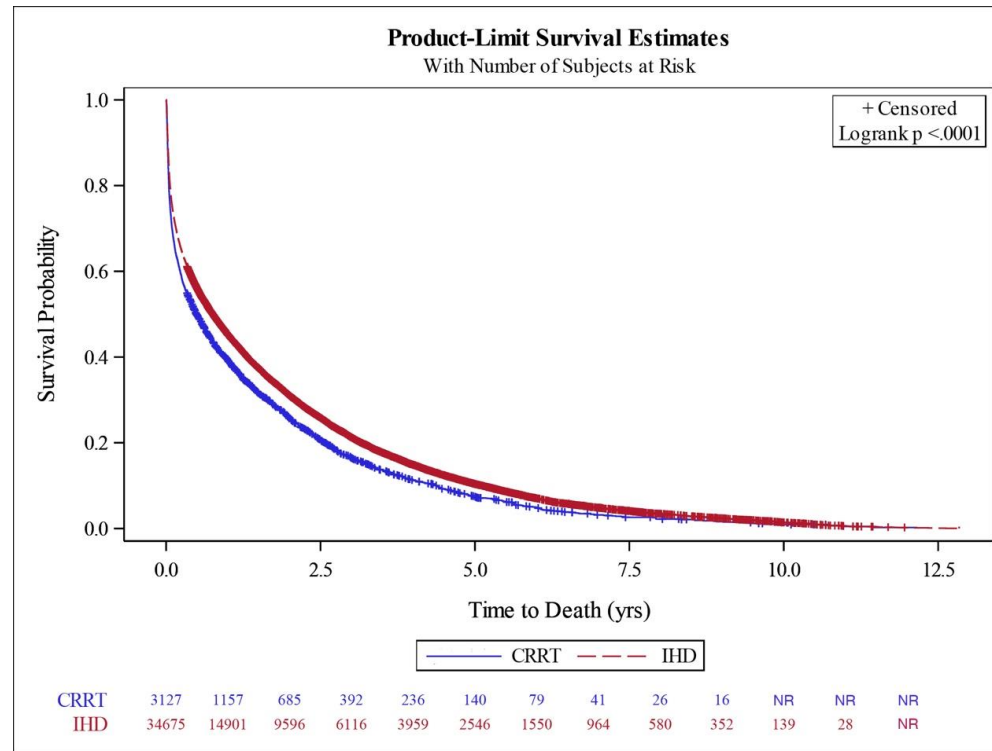

**Supplemental Figure 1: CRRT is Associated with Reduced Survival of ESRD Patients in the ICU after Stroke Compared to IHD.** Shown is a Kaplan-Meier survival curve comparing ESRD patients with stroke administered intermittent hemodialysis (IHD) or continuous renal replacement therapy (CRRT). NR = Not Reported, per USRDS regulations that observations of 10 or less must be suppressed.
